# Supplementary material for: Molecular Cloning and Characterization of Carbonic Anhydrase XII from Pufferfish (Takifugu rubripes)
Source: MDPI journal article supplement (doi:10.3390/ijms19030842), 2018-03-13
Supplement: s1 [file s1]

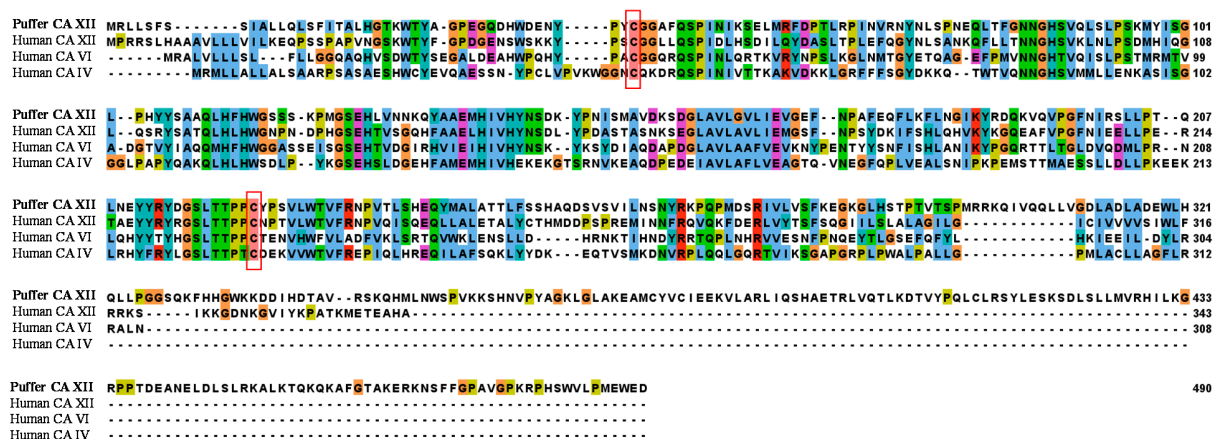

**Figure S1.** Multiple sequence alignment of membrane-bound carbonic anhydrase proteins: pufferfish CA XII, human CA XII, human CA VI, and human CA IV. The red colored hollow boxes show the conserved cysteine residues that likely form a disulfide bond in the CA proteins.

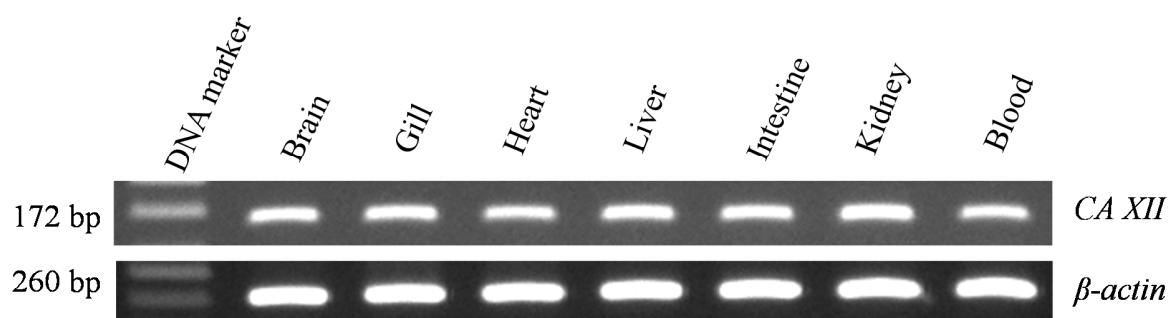

**Figure S2.** mRNA expression of carbonic anhydrase CA XII in different tissues (brain, gill, heart, liver, intestine, kidney and blood) of pufferfish (*Takifugu rubripes*) quantified by reverse transcription polymerase chain reaction (RT-PCR).  $\beta$ -actin was used as internal control.
